# Supplementary material for: Variations in the structure and reactivity of thioester functionalized self-assembled monolayers and their use for controlled surface modification
Source: publisher site journal article supplement (doi:10.3762/bjnano.3.24), 2012-03-09
Supplement: Additional file 1 [file 2190-4286-3-24-S1.pdf]

# Supporting Information

for

## **Variations in the structure and reactivity of thioester functionalized self-assembled monolayers and their use for controlled surface modification**

Inbal Aped, Yacov Mazuz, and Chaim N. Sukenik\*

Address: Department of Chemistry and Institute for Nanotechnology and Advanced  
Materials, Bar-Ilan University, Ramat-Gan, Israel 52900

E-mail: Chaim Sukenik - [chaim.sukenik@biu.ac.il](mailto:chaim.sukenik@biu.ac.il)

\*corresponding author

**Isolated yields,  $^1\text{H}$  and  $^{13}\text{C}$  NMR, and exact mass MS data  
for the olefin-thioester precursors of compounds 1–4.**

**$\omega$ -Undecenyl thiopropionate:** yield 1.9 g (73%).

**$^1\text{H NMR}$ :** 1.15 (t,  $J = 7.5$  Hz, 3H), 1.26–1.37 (m, 12H), 1.54 (m, 2H), 2.02 (m, 2H), 2.54 (q,  $J = 7.5$  Hz, 2H), 2.84 (t,  $J = 7.5$ , 2H), 4.88–5.05 (m, 2H), 5.81 (ddt,  $J = 6.6, 10.2, 17$  Hz, 1H);

**$^{13}\text{C NMR}$ :** 9.81, 28.85, 28.93, 29.01, 29.19 (2C), 29.50 (2C), 29.70, 33.9, 37.52, 114.22, 139.25, 200.47.

**MS:**  $\text{MH}^+$   $\text{C}_{14}\text{H}_{27}\text{OS}$ ; 243.1777 (found), 243.1783 (calculated);

**$\omega$ -Undecenyl thiobutyrate:** yield (76%).

**$^1\text{H NMR}$ :** 0.94 (t,  $J = 7.5$  Hz, 3H), 1.26–1.37 (m, 12H), 1.54 (m, 2H), 1.67 (sextet,  $J = 7.5$  Hz, 2H), 2.03 (m, 2H), 2.5 (t,  $J = 7.5$  Hz, 2H), 2.84 (t,  $J = 7.5$  Hz, 2H), 4.88–5.05 (m, 2H), 5.81 (ddt,  $J = 6.6, 10.2, 17$  Hz, 1H);

**$^{13}\text{C NMR}$ :** 13.6, 19.33, 28.89, 28.92, 29.02, 29.2 (2C), 29.50 (2C), 29.72, 33.91, 46.09, 114.22, 139.29, 199.74.

**MS:**  $\text{MH}^+$   $\text{C}_{15}\text{H}_{29}\text{OS}$ ; 257.1894 (found), 257.1939 (calculated);

$\text{M}^+$   $\text{C}_{15}\text{H}_{28}\text{OS}$ ; 256.1836 (found), 256.1861 (calculated);

**$\omega$ -Undecenyl thiopentanoate:** yield (80%).

**$^1\text{H NMR}$ :** 0.9 (t,  $J = 7.5$  Hz, 3H), 1.26–1.37 (m, 14H), 1.54 (m, 2H), 1.62 (m, 2H), 2.02 (m, 2H), 2.52 (t,  $J = 7.5$  Hz, 2H), 2.84 (t,  $J = 7.5$ , 2H), 4.88–5.05 (m, 2H), 5.81 (ddt,  $J = 6.6, 10.2, 17$  Hz, 1H);

**$^{13}\text{C NMR}$ :** 13.83, 22.23, 27.89, 28.93 (2C), 29.03, 29.21 (2C), 29.51 (2C), 29.72, 33.92, 43.98, 114.23, 139.29, 199.86.

**MS:**  $\text{MH}^+$   $\text{C}_{16}\text{H}_{31}\text{OS}$ ; 271.2063 (found), 271.2096 (calculated);

$\text{M}^+$   $\text{C}_{16}\text{H}_{30}\text{OS}$ ; 270.1982 (found), 270.2017 (calculated);

**$\omega$ -Undecenyl thiohexanoate:** yield (76%).

**$^1\text{H NMR}$ :** 0.87 (t,  $J = 7.5$  Hz, 3H), 1.26–1.37 (m, 16H), 1.54 (m, 2H), 1.64 (m, 2H), 2.02 (m, 2H), 2.51 (t,  $J = 7.5$  Hz, 2H), 2.84 (t,  $J = 7.5$ , 2H), 4.88–5.05 (m, 2H), 5.81 (ddt,  $J = 6.6, 10.2, 17$  Hz, 1H);

**<sup>13</sup>C NMR:** 13.97, 22.43, 25.5, 28.92 (2C), 29.02, 29.2 (2C), 29.51 (2C), 29.71, 31.22, 33.9, 44.21, 114.22, 139.26, 199.85.

**MS:** MH<sup>+</sup> C<sub>17</sub>H<sub>33</sub>OS; 285.2251 (found), 285.2252 (calculated);

**ω-Undecenyl thioheptanoate:** yield (85%).

**<sup>1</sup>H NMR:** 0.87 (t, *J* = 7.5 Hz, 3H), 1.26–1.37 (m, 18H), 1.54 (m, 2H), 1.64 (m, 2H), 2.02 (m, 2H), 2.51 (t, *J* = 7.5 Hz, 2H), 2.84 (t, *J* = 7.5, 2H), 4.88–5.05 (m, 2H), 5.81 (ddt, *J* = 6.6, 10.2, 17 Hz, 1H);

**<sup>13</sup>C NMR:** 13.93, 22.43, 25.6, 28.56, 28.72, 28.75, 28.86, 29.03 (2C), 29.33, 29.36, 29.55, 31.39, 33.74, 44.08, 114.05, 139.07, 199.61.

**MS:** MH<sup>+</sup> C<sub>18</sub>H<sub>35</sub>OS; 299.2382 (found), 299.2409 (calculated);

**ω-Undecenyl thiooctanoate:** yield (71%).

**<sup>1</sup>H NMR:** 0.87 (t, *J* = 7.5 Hz, 3H), 1.26–1.37 (m, 20H), 1.54 (m, 2H), 1.64 (m, 2H), 2.02 (m, 2H), 2.51 (t, *J* = 7.5 Hz, 2H), 2.84 (t, *J* = 7.5, 2H), 4.88–5.05 (m, 2H), 5.81 (ddt, *J* = 6.6, 10.2, 17 Hz, 1H);

**<sup>13</sup>C NMR:** 14.17, 22.71, 25.84, 28.93 (2C), 29.04 (3C), 29.22 (2C), 29.53 (2C), 29.72, 31.75, 33.92, 44.27, 114.23, 139.28, 199.87.

**MS:** MH<sup>+</sup> C<sub>19</sub>H<sub>37</sub>OS; 313.2569 (found), 313.2565 (calculated);

**ω-Undecenyl thiononanoate:** yield (81%).

**<sup>1</sup>H NMR:** 0.86 (t, *J* = 7.5 Hz, 3H), 1.26–1.37 (m, 22H), 1.54 (m, 2H), 1.64 (m, 2H), 2.02 (m, 2H), 2.51 (t, *J* = 7.5 Hz, 2H), 2.84 (t, *J* = 7.5, 2H), 4.88–5.05 (m, 2H), 5.81 (ddt, *J* = 6.6, 10.2, 17 Hz, 1H);

**<sup>13</sup>C NMR:** 14.19, 22.75, 25.83, 28.91, 28.93, 29.03, 29.07, 29.2 (3C), 29.33 29.53 (2C), 29.72, 31.91, 33.92, 44.27, 114.23, 139.27, 199.87.

**MS:** MH<sup>+</sup> C<sub>20</sub>H<sub>39</sub>OS; 327.2766 (found), 327.2722 (calculated);

**$\omega$ -Undecenyl thiodecanoate:** yield (74%).

**$^1\text{H NMR}$ :** 0.86 (t,  $J = 7.5$  Hz, 3H), 1.26–1.37 (m, 24H), 1.54 (m, 2H), 1.64 (m, 2H), 2.02 (m, 2H), 2.51 (t,  $J = 7.5$  Hz, 2H), 2.84 (t,  $J = 7.5$ , 2H), 4.88–5.05 (m, 2H), 5.81 (ddt,  $J = 6.6, 10.2, 17$  Hz, 1H);

**$^{13}\text{C NMR}$ :** 14.24, 22.8, 25.87, 28.95 (2C), 29.06, 29.1, 29.24 (2C), 29.39 (2C) 29.53 (3C), 29.73, 31.99, 33.94, 44.31, 114.25, 139.35, 200.01.

**MS:**  $\text{MH}^+$   $\text{C}_{21}\text{H}_{41}\text{OS}$ ; 341.2892 (found), 341.2878 (calculated);

$\text{M}^+$   $\text{C}_{16}\text{H}_{30}\text{OS}$ ; 270.1982 (found), 270.2017 (calculated);

**S-undec-10-enyl benzothioate:** yield (76%). NMR taken in Bruker DPX 200 spectrometer.

**$^1\text{H NMR}$ :** 1.13–1.51 (m, 12H), 1.67 (m, 2H), 2.03 (m, 2H), 3.06 (t,  $J = 7.2$  Hz, 2H), 4.88–5.05 (m, 2H), 5.81 (ddt,  $J = 6.6, 10.2, 17$  Hz, 1H), 7.42 (m, 2H), 7.55 (tt,  $J = 1.4, 7.3$  Hz, 1H), 7.97 (m, 2H);

**$^{13}\text{C NMR}$ :** 29.04 (2C), 29.12, 29.20, 29.23, 29.52 (2C), 29.66, 33.93, 114.23, 127.28 (2C), 128.63 (2C), 133.27, 137.39, 139.27, 192.16;

**MS:**  $\text{MH}^+$   $\text{C}_{18}\text{H}_{27}\text{OS}$ ; 291.1760 (found), 291.4760 (calculated).

**S-undec-10-enyl thiophene-3-carbothioate:** yield (70%). NMR taken in Bruker DPX 200 spectrometer. Mass spectrum was recorded on a Q-ToF micro (Waters U.K.) using ESI.

**$^1\text{H NMR}$ :** 1.18–1.50 (m, 12H), 1.66 (m, 2H), 2.04 (m, 2H), 3.04 (t,  $J = 7.1$  Hz, 2H), 4.88–5.05 (m, 2H), 5.81 (ddt,  $J = 6.6, 10.2, 17$  Hz, 1H), 7.31 (dd,  $J = 3, 5.1$  Hz, 1H), 7.53 (dd,  $J = 1.3, 5.1$  Hz, 1H), 8.09 (dd,  $J = 1.3, 3$  Hz, 1H);

**$^{13}\text{C NMR}$ :** 28.99 (3C), 29.22 (2C), 29.52 (2C), 29.76, 33.92, 114.25, 126.13, 126.40, 130.32, 139.31, 141.29, 185.81;

**MS:**  $\text{MH}^+$   $\text{C}_{16}\text{H}_{25}\text{OS}_2$ ; 297 (found), 297.5050 (calculated).

**S-undec-10-enyl thiophene-2-carbothioate:** yield (80%). NMR taken in Bruker DPX 200 spectrometer. Mass spectrum was recorded on a Q-ToF micro (Waters U.K.) using ESI.

**<sup>1</sup>H NMR:** 1.21–1.50 (m, 12H), 1.67 (m, 2H), 2.04 (m, 2H), 3.06 (t,  $J = 7.1$  Hz, 2H), 4.88–5.05 (m, 2H), 5.81 (ddt,  $J = 6.6, 10.2, 17$  Hz, 1H), 7.10 (dd,  $J = 3.85, 5$  Hz, 1H), 7.59 (dd,  $J = 1.15, 5$  Hz, 1H), 7.79 (dd,  $J = 1.15, 3.85$  Hz, 1H);

**<sup>13</sup>C NMR:** 28.97, 29.04, 29.22 (2C), 29.33, 29.53 (2C), 29.77, 33.93, 114.25, 127.93, 130.94, 132.47, 139.34, 142.52, 184.28;

**MS:** MH<sup>+</sup> C<sub>16</sub>H<sub>25</sub>OS<sub>2</sub>; 297 (found), 297.5050 (calculated).

The isolated yields and NMR data for each of the trichlorosilanes is as follows:

**1a:** 60 °C and 16 h, yield (90%).

**<sup>1</sup>H NMR:** 1.16–1.47 (m, 16H), 1.56 (m, 4H), 2.32 (s, 3H), 2.86 (t,  $J = 7.1$  Hz, 2H);

**<sup>13</sup>C NMR:** 22.37, 24.43, 28.93, 29.11, 29.21, 29.28, 29.42, 29.53, 29.61 (2C), 30.76, 31.93, 196.2401.

**1b:** 60 °C and 16 h, yield (80%).

**<sup>1</sup>H NMR:** 1.17 (t,  $J = 7.5$  Hz, 3H), 1.26–1.37 (m, 16H), 1.54 (m, 4H), 2.55 (q,  $J = 7.5$  Hz, 2H), 2.84 (t,  $J = 7.5$  Hz, 2H);

**<sup>13</sup>C NMR:** 9.72, 22.22, 24.28, 28.73, 28.8, 28.96, 29.06, 29.27, 29.38, 29.44, 29.57, 31.77, 37.42, 200.52.

**1c:** 60 °C and 16 h, yield (82%).

**<sup>1</sup>H NMR:** 0.94 (t,  $J = 7.5$  Hz, 3H), 1.26–1.37 (m, 16H), 1.54 (m, 4H), 1.68 (sextet,  $J = 7.5$  Hz, 2H), 2.51 (t,  $J = 7.5$  Hz, 2H), 2.85 (t,  $J = 7.5$  Hz, 2H);

**<sup>13</sup>C NMR:** 13.47, 19.2, 22.22, 24.27, 28.75, 28.78, 28.95, 29.06, 29.27, 29.38, 29.44, 29.57, 31.77, 45.95, 199.71.

**1d:** 60 °C and 16 h, yield (78%).

**<sup>1</sup>H NMR:** 0.9 (t,  $J = 7.5$  Hz, 3H), 1.26–1.37 (m, 18H), 1.5–1.68 (m, 6H), 2.53 (t,  $J = 7.5$  Hz, 2H), 2.85 (t,  $J = 7.5$  Hz, 2H);

**<sup>13</sup>C NMR:** 13.71, 22.09, 22.22, 24.28, 27.76, 28.78 (2C), 28.96, 29.06, 29.28, 29.38, 29.45, 29.57, 31.78, 43.85, 199.89.

**1e:** 60 °C and 16 h, yield (68%).

**<sup>1</sup>H NMR:** 0.89 (m, 3H), 1.26–1.37 (m, 20H), 1.5–1.68 (m, 6H), 2.53 (t, *J* = 7.5 Hz, 2H), 2.85 (t, *J* = 7.5 Hz, 2H);

**<sup>13</sup>C NMR:** 13.86, 22.22, 22.31, 24.28, 25.4, 28.8 (2C), 28.97, 29.07, 29.28, 29.39, 29.45, 29.56, 31.09, 31.78, 44.1, 200.08.

**1f:** 60 °C and 16 h, yield (82%).

**<sup>1</sup>H NMR:** 0.88 (m, 3H), 1.26–1.37 (m, 22H), 1.5–1.68 (m, 6H), 2.53 (t, *J* = 7.5 Hz, 2H), 2.85 (t, *J* = 7.5 Hz, 2H);

**<sup>13</sup>C NMR:** 14.01, 22.23, 22.44, 24.29, 25.68, 28.61, 28.8 (2C), 28.97, 29.08, 29.29, 29.4, 29.46, 29.58, 31.43, 31.79, 44.15, 199.96.

**1g:** 60 °C and 16 h, yield (69%).

**<sup>1</sup>H NMR:** 0.88 (m, 3H), 1.26–1.37 (m, 24H), 1.5–1.68 (m, 6H), 2.53 (t, *J* = 7.5 Hz, 2H), 2.85 (t, *J* = 7.5 Hz, 2H);

**<sup>13</sup>C NMR:** 14.05, 22.23, 22.57, 24.28, 25.72, 28.79 (2C), 28.9 (2C), 28.97, 29.07, 29.28, 29.39, 29.45, 29.56, 31.61, 31.78, 44.14, 200.04.

**1h:** 60 °C and 16 h, yield (86%).

**<sup>1</sup>H NMR:** 0.87 (m, 3H), 1.26–1.37 (m, 26H), 1.5–1.68 (m, 6H), 2.52 (t, *J* = 7.5 Hz, 2H), 2.85 (t, *J* = 7.5 Hz, 2H);

**<sup>13</sup>C NMR:** 14.07, 22.22, 22.61, 24.27, 25.69, 28.78 (2C), 28.93, 28.96, 29.06 (2C), 29.19, 29.28, 29.39, 29.45, 29.57, 31.77 (2C), 44.12, 199.84.

**1i:** 60 °C and 16 h, yield (79%).

**<sup>1</sup>H NMR:** 0.87 (m, 3H), 1.26–1.37 (m, 28H), 1.5–1.68 (m, 6H), 2.52 (t,  $J = 7.5$  Hz, 2H), 2.85 (t,  $J = 7.5$  Hz, 2H);

**<sup>13</sup>C NMR:** 14.09, 22.22, 22.62, 24.28, 25.71, 28.79 (2C), 28.93, 28.96, 29.07, 29.24 (2C), 29.28, 29.36, 29.39, 29.45, 29.58, 31.79, 31.83, 44.13, 199.88.

**2:** 60 °C and 21 h, yield (90%).

**<sup>1</sup>H NMR:** 1.22–1.49 (m, 16H), 1.52–1.73 (m, 4H), 3.07 (t,  $J = 7.4$  Hz, 2H), 7.44 (m, 2H), 7.56 (tt,  $J = 1.4, 7.3$  Hz, 1H), 7.97 (m, 2H);

**<sup>13</sup>C NMR:** 22.39, 24.45, 29.05, 29.13, 29.19, 29.26, 29.45, 29.56, 29.62, 29.70, 31.94, 127.32 (2C), 128.69 (2C), 133.34, 137.42, 192.29.

**3:** 80 °C and 40 h, yield (90%).

**<sup>1</sup>H NMR:** 1.22–1.47 (m, 16H), 1.52–1.72 (m, 4H), 3.04 (t,  $J = 7.3$  Hz, 2H), 7.32 (dd,  $J = 3, 5.1$  Hz, 1H), 7.53 (dd,  $J = 1.3, 5.1$  Hz, 1H), 8.10 (dd,  $J = 1.3, 3$  Hz, 1H);

**<sup>13</sup>C NMR:** 22.25, 24.31, 28.87 (2C), 28.98, 29.11, 29.30, 29.41, 29.47, 29.64, 31.80, 126.02, 126.30, 130.21, 141.18, 185.75.

**4:** 80 °C and 40 h, yield (90%).

**<sup>1</sup>H NMR:** 1.26–1.47 (m, 16H), 1.51–1.73 (m, 4H), 3.06 (t,  $J = 7.3$  Hz, 2H), 7.10 (dd,  $J = 3.85, 5.$  Hz, 1H), 7.59 (dd,  $J = 1.15, 5$  Hz, 1H), 7.79 (dd,  $J = 1.15, 3.85$  Hz, 1H);

**<sup>13</sup>C NMR:** 22.39, 24.44, 28.96, 29.12, 29.23, 29.34, 29.43, 29.54, 29.60, 29.79, 31.93, 127.95, 130.95, 132.49, 142.52, 184.29.
